# Supplementary material
Source: publisher figshare collection journal article supplement (https://tandf.figshare.com/ndownloader/files/13904384)
Supplement: Supplementary file 1 [file 13904384]

**List of captions**

Figure 1: Rakan statues at Fumonji Temple, Rikuzentakata, Japan (Photo by A. Martini).

Figure 2: Ipponmatsu (Miracle Tree) in Rikuzentakata, Japan. (Photo courtesy of Flavia Fulco, Sophia University, Tokyo).
